# Supplementary material for: A broadly neutralizing antibody protects against SARS-CoV, pre-emergent bat CoVs, and SARS-CoV-2 variants in mice
Source: PubMed Central journal article supplement — bioRxiv. 2021 Apr 28:2021.04.27.441655. Preprint. [Version 1] doi: 10.1101/2021.04.27.441655 (PMC8095197; doi:10.1101/2021.04.27.441655), 2021-04-28
Supplement: NIHPP2021.04.27.441655-supplement-1.pdf [file NIHPP2021.04.27.441655-supplement-1.pdf]

737

738

739

740

741

742

743

744

745

746

747

748 **Supplemental Figure Legends**

749

750 **Figure S1. The binding activity of cross-reactive antibodies against MERS-CoV and human**  
751 **common-cold CoVs.**

752 The neutralization activity of four broadly neutralizing antibodies against SARS-CoV-2 NTD,  
753 MERS-CoV spike, HCoV-OC43 spike, HCoV-NL63, and HCoV-229E shown for (A) DH1235,  
754 (B) DH1073, (C) DH1046, and (D) DH1047.

755

756 **Figure S2. NSEM of DH1047 bound to bat RsSHC014 and SARS-CoV spike ectodomains.**

757 (A) Representative 2D class averages of bat RsSHC014 2P spike ectodomain bound to DH1047  
758 Fab.

759 (B) Overlay of 3D reconstruction of DH1047 bound to bat RsSHC014 2P (grey) and SARS-  
760 CoV-2 HexaPro (purple) S ectodomains.  
761 (C) Representative 2D class averages of SARS-CoV 2P spike ectodomain bound to DH1047 Fab  
762 (D) Overlay of 3D reconstruction of DH1047 bound to bat SARS-CoV 2P (grey) and SARS-  
763 CoV-2 HexaPro (purple) S ectodomains. The red boxes in panels A and C indicate the classes  
764 that show DH1047 Fab bound to spike.

765

766

767 **Figure S3. Lung H+E staining of SARS-CoV infected mice.**

768 Pathologic features of acute lung injury were scored using two separate tools: the American  
769 Thoracic Society Lung Injury Scoring (ATS ALI) system. Using this ATS ALI system, we  
770 created an aggregate score for the following features: neutrophils in the alveolar and interstitial  
771 space, hyaline membranes, proteinaceous debris filling the air spaces, and alveolar septal  
772 thickening. Three randomly chosen high power ( $\times 60$ ) fields of diseased lung were assessed per  
773 mouse. Representative images are shown from vehicle and RDV-treated mice. All images were  
774 taken at the same magnification. The black bar indicates 100  $\mu\text{m}$  scale. (A) CH65 control  
775 prophylaxis. (B) CH65 therapy. (C) DH1047 prophylaxis. (D) DH1047 therapy.

776

777

778 **Figure S4. The affinity data of DH1047 against SARS-CoV and RsSHC014 spikes.**

779 Surface plasmon resonance (SPR) binding experiments of DH1047 against (A) SARS-CoV-2  
780 Toronto and (B) RsSHC014. Binding affinity measurements are shown in the tables and response

781 units (RU) as a function of time in seconds (s) is shown for both SARS-CoV and RsSHC014.

782 SPR experiments were repeated twice.

783

784 **Figure S5. Cryo-EM data processing for the SARS-CoV spike ectodomain bound to**

785 **DH1047, Related to Figure 2.**

786 (A) Representative cryo-EM micrograph.

787 (B) Cryo-EM CTF fit.

788 (C) Representative 2D class averages from Cryo-EM dataset.

789 (D) *Ab initio* reconstruction.

790 (E) Refined map.

791 (F) Fourier shell correlation curve.

792 (G) Refined cryo-EM map colored by local resolution.

793 (H) Zoom-in images showing the SD1, NTD, HR1/CH and RBD/Fab contact regions in the

794 structure. The cryo-EM map is shown as a blue mesh and the fitted model is in cartoon

795 representation, with residues shown as stick.

796

797 **Figure S6. DH1047 and ADG-2 binds the RBD of SARS-Cov and SARS-CoV-2 spike**

798 **ectodomains using a similar footprint.**

799 (A) Cartoon representation of DH1047 (colored in pale green) bound to the RBD (grey surface,

800 ACE2 binding site in yellow) of SARS-CoV S ectodomain and ADG-2 (cyan) bound to SARS-

801 CoV-2 S ectodomain. The homologous Fab ADI-19425 (PDB 6APC) was docked in the ADG-2

802 cryo-EM map (EMD-23160) to generate the model.

803 (B) DH1047 and ADG-2 bind partially overlapping binding sites on the RBD.

804

805 **Supplemental Table 1: monoclonal antibody screen against SARS-CoV-2 2AA MA, SARS-**  
806 **CoV, WIV-1, and RsSHC014**

807

808 **Supplemental Table 2: Immunogenetic characteristics of broadly cross-reactive mAbs.**

809

810

811

812

813

814

815

816

817

818

819

820

821

822

823

824

825



826

827

| PDB ID                                              | 828                            | Supplementary Table 3.         |
|-----------------------------------------------------|--------------------------------|--------------------------------|
| EMDB ID                                             | 829                            | Cryo-EM data collection and    |
| <b>Data collection and processing</b>               |                                |                                |
| Microscope                                          | FEI Titan Krios <sup>830</sup> | <b>refinements statistics.</b> |
| Detector                                            | Gatan K3                       |                                |
| Magnification                                       | 81,000                         |                                |
| Voltage (kV)                                        | 300                            |                                |
| Electron exposure (e <sup>-</sup> /Å <sup>2</sup> ) | 54.1                           |                                |
| Defocus range (µm)                                  | ~0.75-2.50                     |                                |
| Pixel size (Å)                                      | 1.08                           |                                |
| Reconstruction software                             | cryoSparc                      |                                |
| Symmetry imposed                                    | C1                             |                                |
| Initial particle images (no.)                       | 2,370,616                      |                                |
| Final particle images (no.)                         | 284,619                        |                                |
| Map resolution (Å)                                  | 3.43                           |                                |
| FSC threshold                                       | 0.143                          |                                |
| <b>Refinement</b>                                   |                                |                                |
| Initial model used                                  | 7LD1                           |                                |
| Model resolution (Å)                                | 3.43                           |                                |
| FSC threshold                                       | 0.143                          |                                |
| <b>Model composition</b>                            |                                |                                |
| Nonhydrogen atoms                                   | 28,048                         |                                |
| Protein residues                                    | 3,737                          |                                |
| <b>R.m.s. deviations</b>                            |                                |                                |
| Bond lengths (Å)                                    | 0.016                          |                                |
| Bond angles (°)                                     | 1.956                          |                                |
| <b>Validation</b>                                   |                                |                                |
| MolProbity score                                    | 1.79                           |                                |
| Clashscore                                          | 1.65                           |                                |
| Poor rotamers (%)                                   | 2.36                           |                                |

|                          |       |     |
|--------------------------|-------|-----|
| EM ringer score          | 2.9   | 831 |
| <b>Ramachandran plot</b> |       |     |
| Favored (%)              | 88.54 | 832 |
| Allowed (%)              | 9.79  | 833 |
| Disallowed (%)           | 1.66  |     |
| <hr/>                    |       | 834 |

835

Figure S1

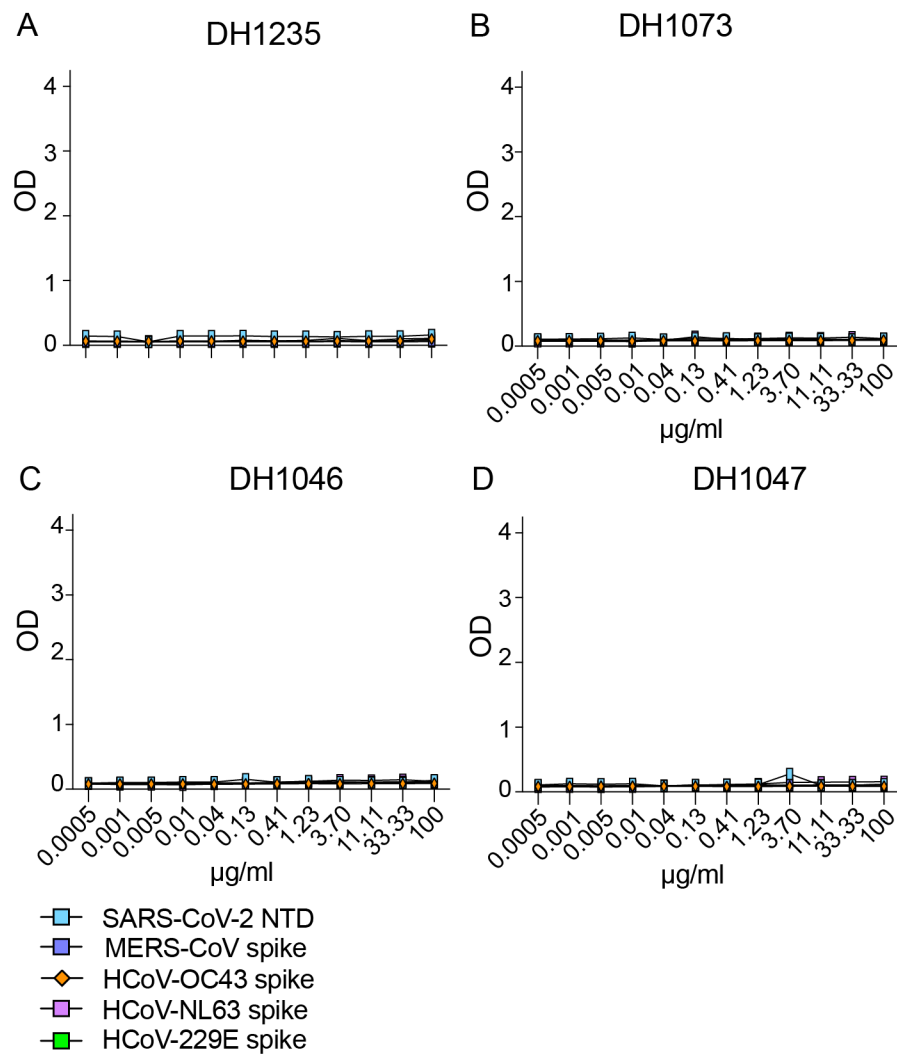

Figure S2

A

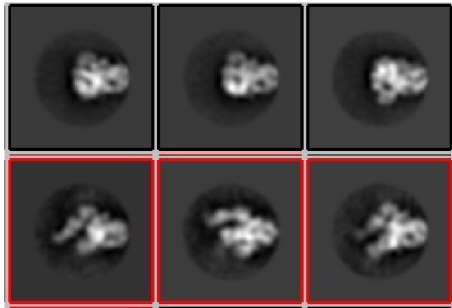

B

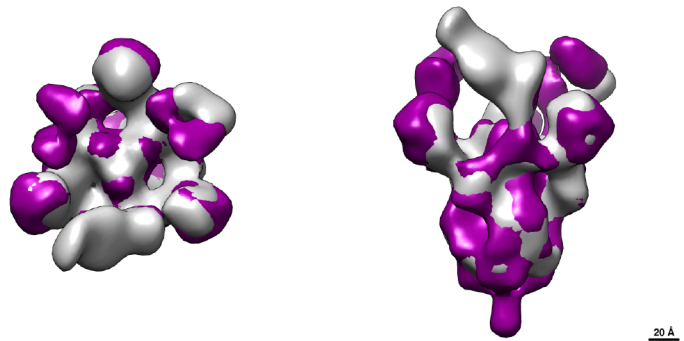

C

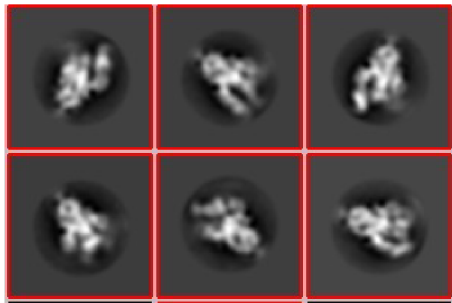

D

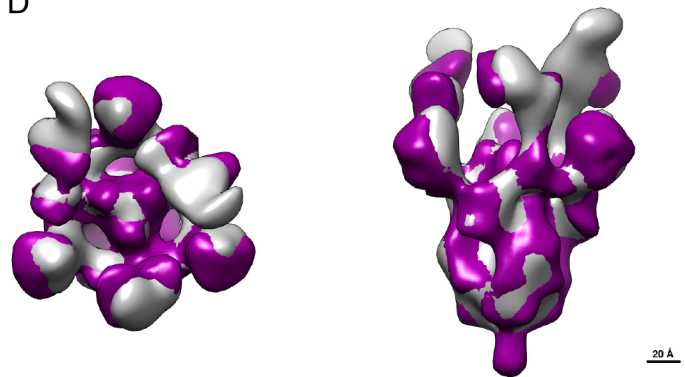

Figure S3

A CH65 control -12hr prophylaxis

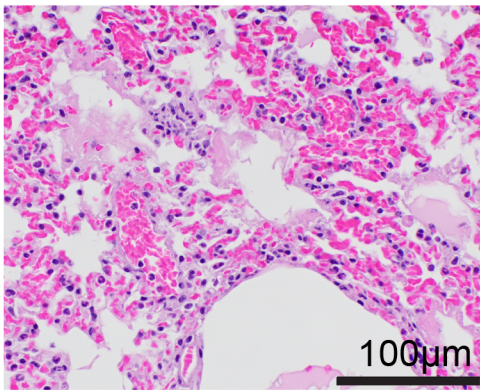

B CH65 +12hr therapy

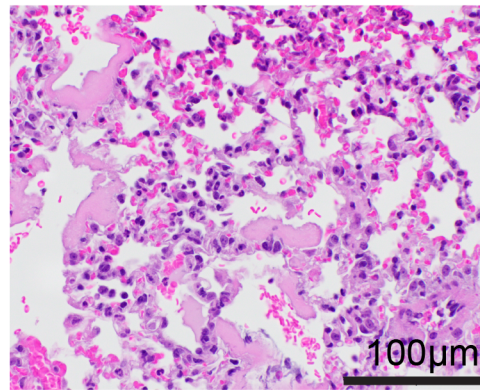

C DH1047 -12hr prophylaxis

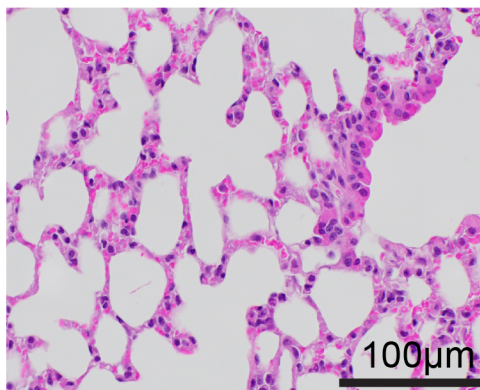

D DH1047 +12hr therapy

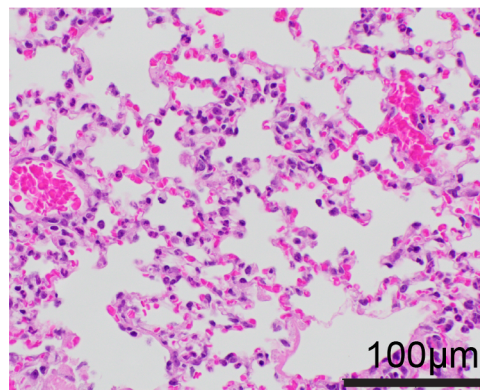

Figure S4

A

| SARS-CoV Toronto spike |           |          |        |
|------------------------|-----------|----------|--------|
| Fab                    | ka (1/Ms) | kd (1/s) | KD(nM) |
| DH1047                 | 9.622E+4  | <1.0E-5  | <0.1   |

DH1047 Fab vs. SARS-CoV Toronto

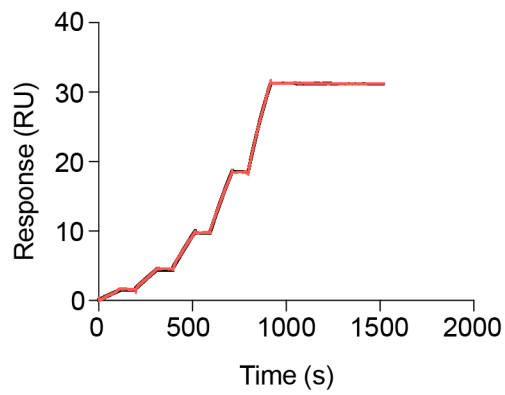

B

| RsSCH014 spike |           |          |        |
|----------------|-----------|----------|--------|
| Fab            | ka (1/Ms) | kd (1/s) | KD(nM) |
| DH1047         | 8.602E+4  | <1.0E-5  | <0.1   |

DH1047 Fab vs. RsSHc014

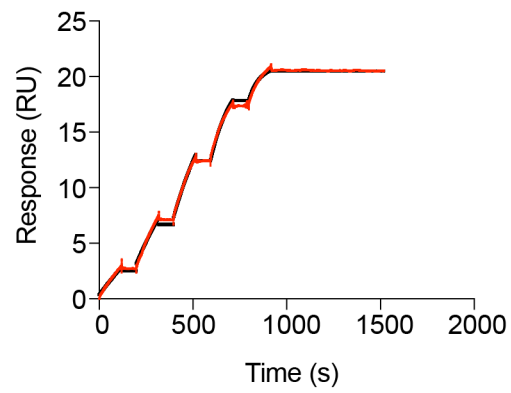



Figure S5

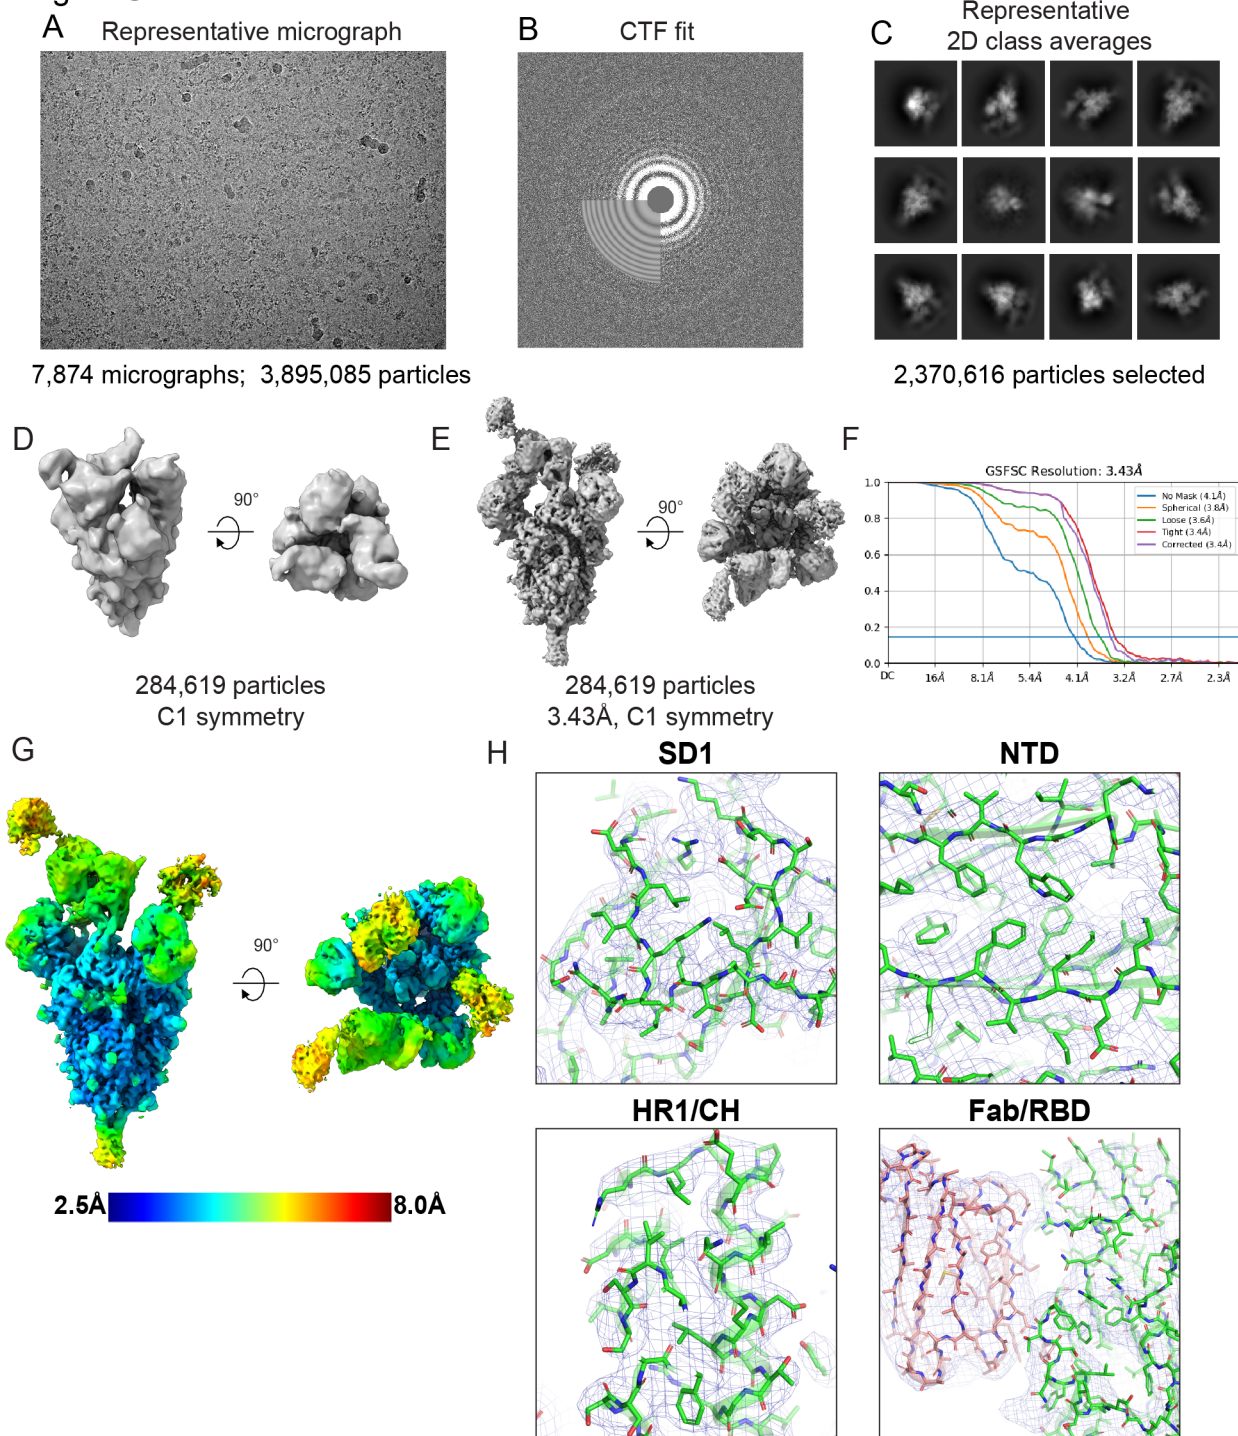

Figure S6

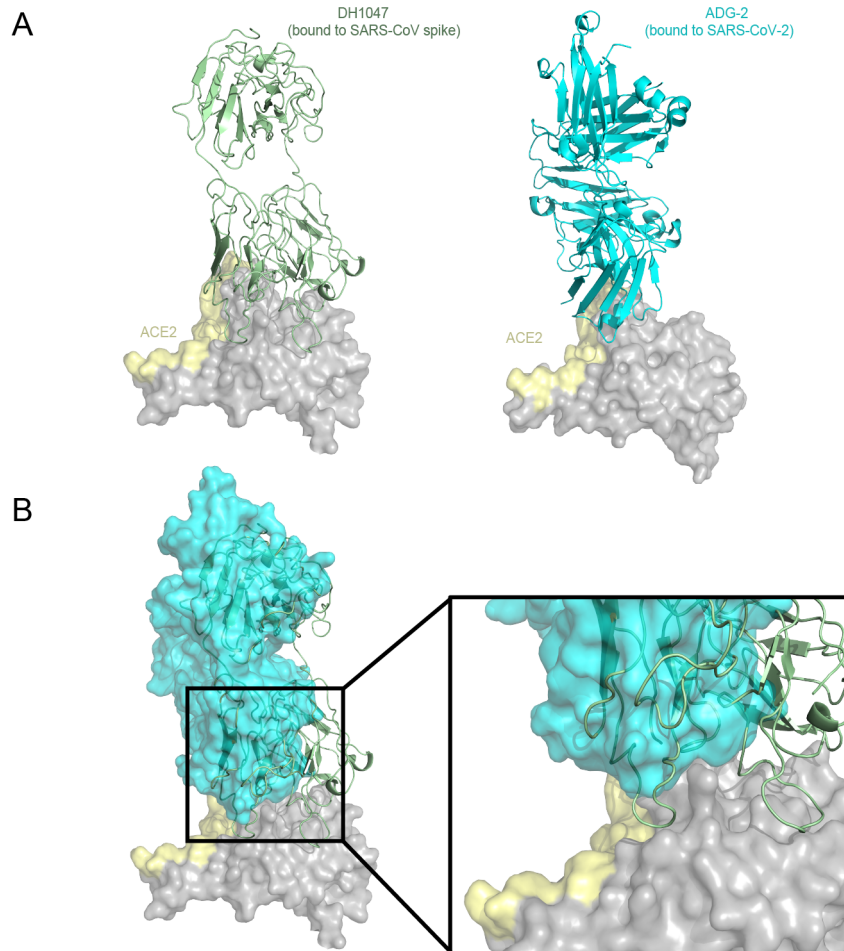



Supplemental Table 1: monoclonal antibody screen against SARS-CoV-2 2AA MA, SARS-CoV, WIV-1, and RsSHC014

| mAb #     | DH #          | mAb                             | Specificity to SARS-CoV-2 | ELISA cross-reactivity                       | Live virus neutralization IC <sub>50</sub> (µg/ml) |               |               |               |
|-----------|---------------|---------------------------------|---------------------------|----------------------------------------------|----------------------------------------------------|---------------|---------------|---------------|
|           |               |                                 |                           |                                              | SARS-CoV-2 2AA MA                                  | SARS-CoV      | WIV-1         | RsSHC014      |
| 1         | DH1058        | Ab711725_G1.4A/293i/Citrate     | S2                        | SARS-CoV-1, MERS-CoV, 229E, NL63, HKU1, OC43 | >10                                                | >10           | >10           | >10           |
| 2         | DH1057        | Ab025934_G1.4A/293i/Citrate     | S2                        | SARS-CoV-1, OC43                             | >10                                                | >10           | >10           | >10           |
| <b>18</b> | <b>DH1047</b> | <b>Ab712384_LS/293i/Citrate</b> | <b>RBD</b>                | <b>SARS-CoV, SARS-CoV-2, and bat CoVs</b>    | <b>0.3979</b>                                      | <b>0.0287</b> | <b>0.191</b>  | <b>0.2005</b> |
| 45        | DH1203        | Ab026044_LS/293i/Citrate        | RBD                       | SARS-CoV and SARS-CoV-2                      | 3.768                                              | 0.04781       | >10           | >10           |
| 46        | DH1127        | Ab026075_LS/293i/Citrate        | RBD                       | SARS-CoV and SARS-CoV-2                      | >10                                                | >10           | >10           | >10           |
| 47        | DH1059        | Ab026129L2_LS/293i/Citrate      | no binding                | SARS-CoV-2                                   | >10                                                | >10           | >10           | >10           |
| 48        | DH1081        | Ab026147_LS/293i/Citrate        | NTD                       | SARS-CoV and SARS-CoV-2                      | >10                                                | >10           | >10           | >10           |
| 49        | DH1085        | Ab026160_LS/293i/Citrate        | no binding                | SARS-CoV-2                                   | >10                                                | >10           | >10           | >10           |
| 50        | DH1080        | Ab026162_LS/293i/Citrate        | RBD                       | SARS-CoV and SARS-CoV-2                      | >10                                                | 0.0059        | 0.0330        | >10           |
| 51        | DH1061.1      | Ab026164_LS/293i/Citrate        | NTD                       | SARS-CoV and SARS-CoV-2                      | >10                                                | >10           | >10           | >10           |
| 52        | DH1065        | Ab026172_LS/293i/Citrate        | NTD                       | SARS-CoV and SARS-CoV-2                      | >10                                                | >10           | >10           | >10           |
| 53        | DH1066        | Ab026186_LS/293i/Citrate        | NTD                       | only SARS-CoV                                | >10                                                | >10           | >10           | >10           |
| 54        | DH1064        | Ab026188_LS/293i/Citrate        | RBD                       | SARS-CoV and SARS-CoV-2                      | >10                                                | 0.0216        | >10           | >10           |
| 55        | DH1067        | Ab026196_LS/293i/Citrate        | NTD                       | SARS-CoV and SARS-CoV-2                      | >10                                                | >10           | >10           | >10           |
| 56        | DH1069        | Ab026200_LS/293i/Citrate        | NTD                       | SARS-CoV and SARS-CoV-2                      | >10                                                | >10           | >10           | >10           |
| <b>57</b> | <b>DH1046</b> | <b>Ab026204_LS/293i/Citrate</b> | <b>RBD</b>                | <b>SARS-CoV, SARS-CoV-2, and bat CoVs</b>    | <b>2.857</b>                                       | <b>0.1033</b> | <b>0.4248</b> | <b>1.274</b>  |
| 58        | DH1068        | Ab026217_LS/293i/Citrate        | NTD                       | SARS-CoV and SARS-CoV-2                      | >10                                                | >10           | >10           | >10           |
| 59        | DH1086        | Ab026240_LS/293i/Citrate        | NTD                       | SARS-CoV and SARS-CoV-2                      | >10                                                | >10           | >10           | >10           |
| 60        | DH1071        | Ab026243_LS/293i/Citrate        | NTD                       | SARS-CoV and SARS-CoV-2                      | >10                                                | >10           | >10           | >10           |
| 61        | DH1088        | Ab026245_LS/293i/Citrate        | no binding                | SARS-CoV-2                                   | >10                                                | >10           | >10           | >10           |
| <b>62</b> | <b>DH1073</b> | <b>Ab026258_LS/293i/Citrate</b> | <b>RBD</b>                | <b>SARS-CoV, SARS-CoV-2, and bat CoVs</b>    | <b>0.8088</b>                                      | <b>0.0161</b> | <b>0.267</b>  | <b>&gt;10</b> |
| <b>64</b> | <b>DH1235</b> | <b>Ab026319_LS/293i/Citrate</b> | <b>RBD</b>                | <b>SARS-CoV, SARS-CoV-2, and bat CoVs</b>    | <b>0.1226</b>                                      | <b>0.0403</b> | <b>0.0602</b> | <b>&gt;10</b> |
| 65        | #N/A          | Ab026336_LS/293i/Citrate        | RBD                       | SARS-CoV and SARS-CoV-2                      | >10                                                | >10           | >10           | >10           |
| 66        | DH1193        | Ab712053_LS/293i/Citrate        | RBD                       | SARS-CoV and SARS-CoV-2                      | 4.345                                              | >10           | >10           | >10           |
| 67        | DH1152        | Ab712109_LS/293i/Citrate        | RBD                       | SARS-CoV and SARS-CoV-2                      | >10                                                | >10           | >10           | >10           |
| 68        | DH1171        | Ab712113_LS/293i/Citrate        | NTD                       | SARS-CoV and SARS-CoV-2                      | >10                                                | >10           | >10           | >10           |
| 69        | DH1109        | Ab712156_LS/293i/Citrate        | RBD                       | SARS-CoV and SARS-CoV-2                      | >10                                                | >10           | >10           | >10           |
| 70        | DH1208        | Ab712166_LS/293i/Citrate        | RBD                       | SARS-CoV and SARS-CoV-2                      | >10                                                | >10           | >10           | >10           |
| 71        | DH1166        | Ab712215_LS/293i/Citrate        | RBD                       | SARS-CoV and SARS-CoV-2                      | >10                                                | >10           | >10           | >10           |
| 72        | DH1191        | Ab712224_LS/293i/Citrate        | RBD                       | SARS-CoV and SARS-CoV-2                      | >10                                                | >10           | >10           | >10           |
| 73        | DH1120        | Ab712294_LS/293i/Citrate        | RBD                       | SARS-CoV and SARS-CoV-2                      | >10                                                | >10           | >10           | >10           |
| 74        | DH1110        | Ab712312_LS/293i/Citrate        | NTD                       | SARS-CoV and SARS-CoV-2                      | >10                                                | >10           | >10           | >10           |
| 75        | DH1106        | Ab712366_LS/293i/Citrate        | NTD                       | SARS-CoV and SARS-CoV-2                      | >10                                                | >10           | >10           | >10           |
| 76        | DH1112        | Ab712370_LS/293i/Citrate        | RBD                       | SARS-CoV and SARS-CoV-2                      | >10                                                | 0.0023        | 0.1617        | >10           |
| 77        | DH1117        | Ab712376_LS/293i/Citrate        | RBD                       | SARS-CoV and SARS-CoV-2                      | >10                                                | >10           | >10           | >10           |
| 78        | DH1115        | Ab712378_LS/293i/Citrate        | RBD                       | SARS-CoV and SARS-CoV-2                      | >10                                                | 0.0083        | 0.1614        | >10           |
| 79        | DH1093        | Ab712381_LS/293i/Citrate        | NTD                       | SARS-CoV and SARS-CoV-2                      | >10                                                | >10           | >10           | >10           |
| 80        | DH1095        | Ab712402_LS/293i/Citrate        | RBD                       | SARS-CoV                                     | >10                                                | >10           | >10           | >10           |
| 81        | DH1113        | Ab712404_LS/293i/Citrate        | RBD                       | SARS-CoV and SARS-CoV-2                      | >10                                                | >10           | >10           | >10           |
| 82        | DH1114        | Ab712407_LS/293i/Citrate        | NTD                       | SARS-CoV and SARS-CoV-2                      | >10                                                | >10           | >10           | >10           |
| 84        | DH1098        | Ab712416_LS/293i/Citrate        | RBD                       | SARS-CoV and SARS-CoV-2                      | >10                                                | 0.0052        | 0.0318        | >10           |
| 85        | DH1101        | Ab712423_LS/293i/Citrate        | RBD                       | SARS-CoV and SARS-CoV-2                      | >10                                                | 0.0012        | >10           | >10           |
| 86        | #N/A          | Ab712561_LS/293i/Citrate        | RBD                       | SARS-CoV and SARS-CoV-2                      | >10                                                | 0.0399        | 0.4312        | >10           |
| 87        | #N/A          | Ab712572_LS/293i/Citrate        | RBD                       | SARS-CoV and SARS-CoV-2                      | >10                                                | >10           | >10           | >10           |
| 88        | #N/A          | Ab712584_LS/293i/Citrate        | RBD                       | SARS-CoV and SARS-CoV-2                      | >10                                                | >10           | >10           | >10           |
| 89        | #N/A          | Ab712585_LS/293i/Citrate        | RBD                       | SARS-CoV and SARS-CoV-2                      | >10                                                | >10           | >10           | >10           |
| 90        | #N/A          | Ab712588_LS/293i/Citrate        | RBD                       | SARS-CoV and SARS-CoV-2                      | >10                                                | >10           | >10           | >10           |
| 91        | #N/A          | Ab712614L_LS/293i/Citrate       | RBD                       | SARS-CoV and SARS-CoV-2                      | >10                                                | >10           | >10           | >10           |
| 92        | #N/A          | Ab712617_LS/293i/Citrate        | RBD                       | SARS-CoV and SARS-CoV-2                      | >10                                                | >10           | >10           | >10           |
| 93        | #N/A          | Ab712618_LS/293i/Citrate        | RBD                       | SARS-CoV and SARS-CoV-2                      | 9.877                                              | >10           | >10           | >10           |

Supplemental Table 2: Immunogenetic characteristics of broadly cross-reactive mAbs

| DH#    | Antibody ID | Binding Specificity | Cross Reactivity                                       | Antibody Gene Analysis  |            |              |                      |          |         |              |                      |          |         |
|--------|-------------|---------------------|--------------------------------------------------------|-------------------------|------------|--------------|----------------------|----------|---------|--------------|----------------------|----------|---------|
|        |             |                     |                                                        | Donor ID                | Time Point | HCDR3 Length | Heavy chain mutation | VH_Gene  | JH_Gene | LCDR3 Length | Light chain mutation | VL_Gene  | JL_Gene |
| DH1235 | Ab026319_LS | RBD                 | SARS-CoV-1                                             | SARS-CoV-2 convalescent | Day 36     | 21           | 1.68                 | IGHV3-48 | IGHJ4   | 9            | 1.75                 | IGLV4-60 | IGLJ2   |
| DH1073 | Ab026258_LS | RBD                 | SARS-CoV-1                                             | SARS-CoV convalescent   | Year 17    | 15           | 9.06                 | IGHV1-46 | IGHJ6   | 11           | 2.92                 | IGKV3-11 | IGKJ1   |
| DH1046 | Ab026204_LS | RBD                 | SARS-CoV, PCoV GXP4L, Bat CoV RsSHC014, Bat CoV RaTG13 | SARS-CoV convalescent   | Year 17    | 24           | 4.70                 | IGHV3-23 | IGHJ6   | 9            | 3.65                 | IGKV1-5  | IGKJ2   |
| DH1047 | Ab712384_LS | RBD                 | SARS-CoV, PCoV GXP4L, Bat CoV RsSHC014, Bat CoV RaTG13 | SARS-CoV convalescent   | Year 17    | 24           | 8.05                 | IGHV1-46 | IGHJ4   | 9            | 2.05                 | IGKV4-1  | IGKJ1   |
